# Supplementary material for: Comprehensive Analysis of Maternal and Infant Microbiome Profiles: Maternal Microbial Transmission Shapes Offspring Somatic Growth Trajectory
Source: Research Square preprint supplement (doi:10.21203/rs.3.rs-8401969/v1), 2026-01-12
Supplement: Supplementary file 2 [file c6fd94b654ff4db8bdca6bdc.docx]

## Table 1 Baseline Characteristics

| **Variable** | **N** | **Trajectory 1**  N = 4611 | **Trajectory 2**  N = 1,3621 | **Trajectory 3**  N = 2671 | **p-value**2 |
| --- | --- | --- | --- | --- | --- |
| **Age, years** | 2,090 | 30.0 (27.0, 33.0) | 29.0 (27.0, 32.0) | 30.0 (27.0, 32.0) | 0.3 |
| **Prepregnancy BMI, kg/m2** | 2,090 | 22.9 (20.5, 25.6) | 22.7 (20.4, 25.5) | 22.9 (20.8, 25.3) | 0.7 |
| **TG** | 2,090 | 1.40 (1.00, 1.70) | 1.30 (1.00, 1.64) | 1.20 (1.00, 1.50)5 | 0.006 |
| **LDLC** | 2,090 | 2.50 (2.08, 3.00) | 2.50 (2.10, 3.00) | 2.40 (2.00, 2.90) | 0.4 |
| **HDLC** | 2,090 | 1.67 (1.43, 1.93) | 1.67 (1.45, 1.92) | 1.70 (1.48, 1.93) | 0.6 |
| **Maternal height, (cm)** | 2,090 | 163.0 (160.0, 166.0)3 | 162.0 (160.0, 165.0) | 162.0 (158.0, 165.0)5 | 0.037 |
| **Paternal height, (cm)** | 2,090 | 176.0 (172.0, 180.0) | 175.0 (172.0, 180.0) | 175.0 (172.0, 180.0) | 0.3 |
| **Education level** | 2,090 |  |  |  | 0.7 |
| Above college or others |  | 390 (85%) | 1,169 (86%) | 225 (84%) |  |
| Below senior high school |  | 71 (15%) | 193 (14%) | 42 (16%) |  |
| **Current or former smoking** | 2,087 | 17 (3.7%) | 35 (2.6%) | 5 (1.9%) | 0.3 |
| **Drinking during pregnancy** | 2,087 | 7 (1.5%) | 23 (1.7%) | 4 (1.5%) | >0.9 |
| **GDM** | 2,090 |  |  |  | 0.7 |
| Cannot be diagnosed |  | 14 (3.0%) | 62 (4.6%) | 12 (4.5%) |  |
| Control |  | 351 (76%) | 1,014 (74%) | 207 (78%) |  |
| GDM |  | 86 (19%) | 255 (19%) | 45 (17%) |  |
| PGDM |  | 10 (2.2%) | 31 (2.3%) | 3 (1.1%) |  |
| **SBP at first prenatal check-up, mmHg** | 2,090 | 110 (100, 119) | 110 (100, 120) | 110 (100, 119) | 0.5 |
| **DBP at first prenatal check-up, mmHg** | 2,090 | 70 (66, 77) | 70 (63, 76) | 70 (62, 78) | 0.6 |
| **Delivery mode** | 2,084 | 3 |  | 5 | 0.031 |
| Caesarean section |  | 243 (53%)3 | 634 (47%) | 116 (44%)5 |  |
| Vaginal delivery |  | 218 (47%)3 | 723 (53%) | 150 (56%)5 |  |
| **Preterm** | 2,090 | 3 |  | 5 | <0.001 |
| Preterm delivery |  | 9 (2.0%)3 | 55 (4.0%) | 22 (8.2%)5 |  |
| Term delivery |  | 452 (98%)3 | 1,307 (96%) | 245 (92%)5 |  |
| **Week of gestation** | 2,090 | 39.00 (39.00, 40.00)3 | 39.00 (38.00, 40.00)4 | 39.00 (38.00, 40.00)5 | <0.001 |
| **Gender of kid** | 2,084 |  |  |  | 0.4 |
| female |  | 200 (43%) | 639 (47%) | 119 (45%) |  |
| male |  | 261 (57%) | 718 (53%) | 147 (55%) |  |
| **Birth weight of child, g** | 2,084 | 3,580 (3,350, 3,820)3 | 3,300 (3,070, 3,560)4 | 3,085 (2,850, 3,380)5 | <0.001 |
| **Birth length of child, cm** | 2,084 | 50.00 (50.00, 51.00) | 50.00 (50.00, 51.00) | 50.00 (50.00, 51.00) | 0.053 |
| **SGA** | 2,084 | 10 (2.2%)3 | 59 (4.3%) | 36 (14%)5 | <0.001 |
| **LGA** | 2,084 | 84 (18%)3 | 130 (9.6%) | 13 (4.9%)5 | <0.001 |
| **Macrosomia** | 2,084 | 54 (12%)3 | 83 (6.1%) | 12 (4.5%)5 | <0.001 |
| **Feeding type** | 1,685 |  |  |  | 0.2 |
| exclusive breastfeeding |  | 212 (58%) | 583 (53%) | 110 (50%) |  |
| exclusive formula fed |  | 8 (2.2%) | 39 (3.5%) | 9 (4.1%) |  |
| mixed feeding |  | 143 (39%) | 480 (44%) | 101 (46%) |  |
| 1Median (Q1, Q3); n (%) | | | | | |
| 2Kruskal-Wallis rank sum test; Pearson's Chi-squared test | | | | | |
| 3Significantly different between Trajectory 1 and Trajectory 2 | | | | | |
| 4Significantly different between Trajectory 2 and Trajectory 3 | | | | | |
| 5Significantly different between Trajectory 1 and Trajectory 3 | | | | | |
