# Supplementary figures and images for: Comprehensive Analysis of Maternal and Infant Microbiome Profiles: Maternal Microbial Transmission Shapes Offspring Somatic Growth Trajectory
Source: Research Square preprint supplement (doi:10.21203/rs.3.rs-8401969/v1), 2026-01-12

### N50 by Quality Class

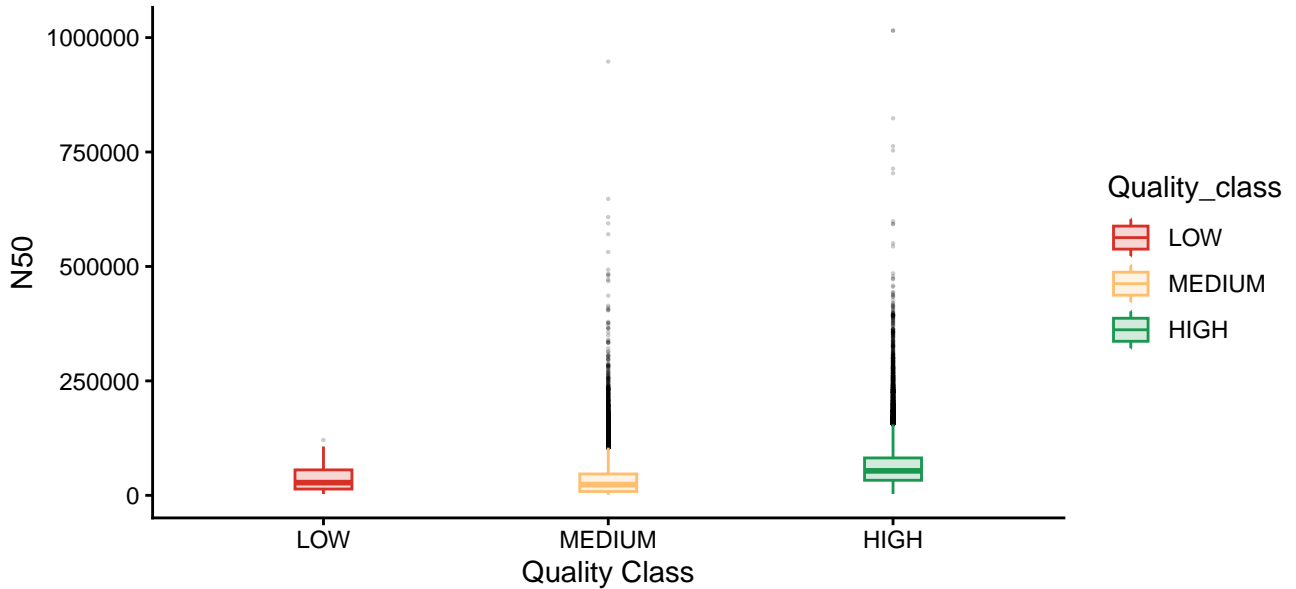

### Strain heterogeneity by Quality Class

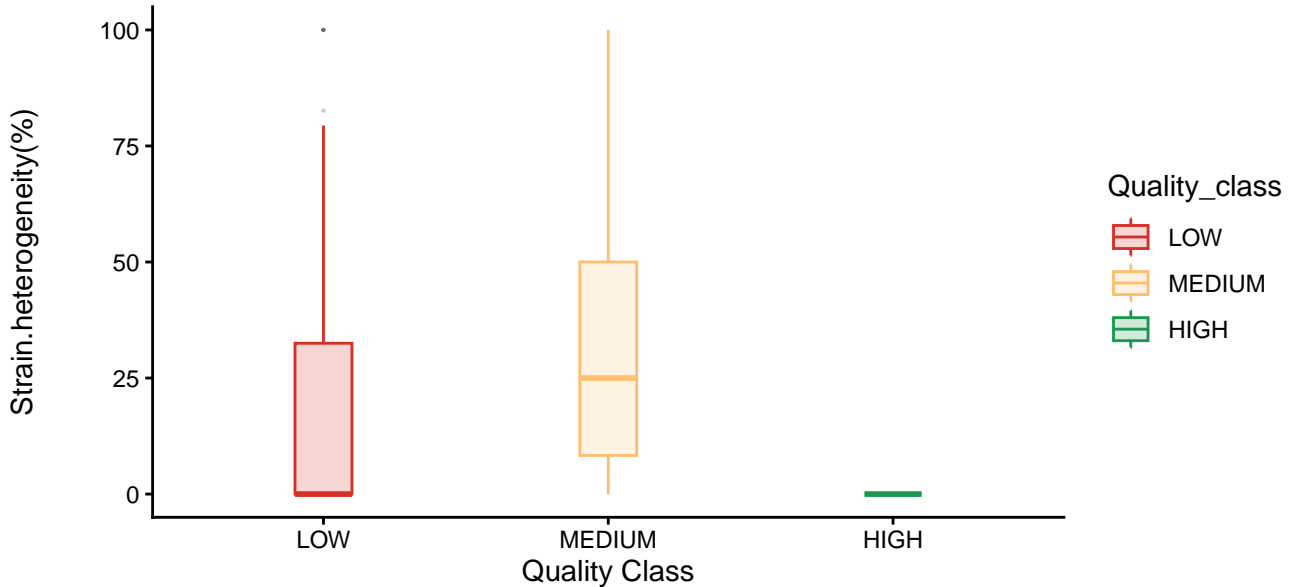

Supplement: Supplementary file 1 [file 02fd64b6b8911100c582c188.pdf]

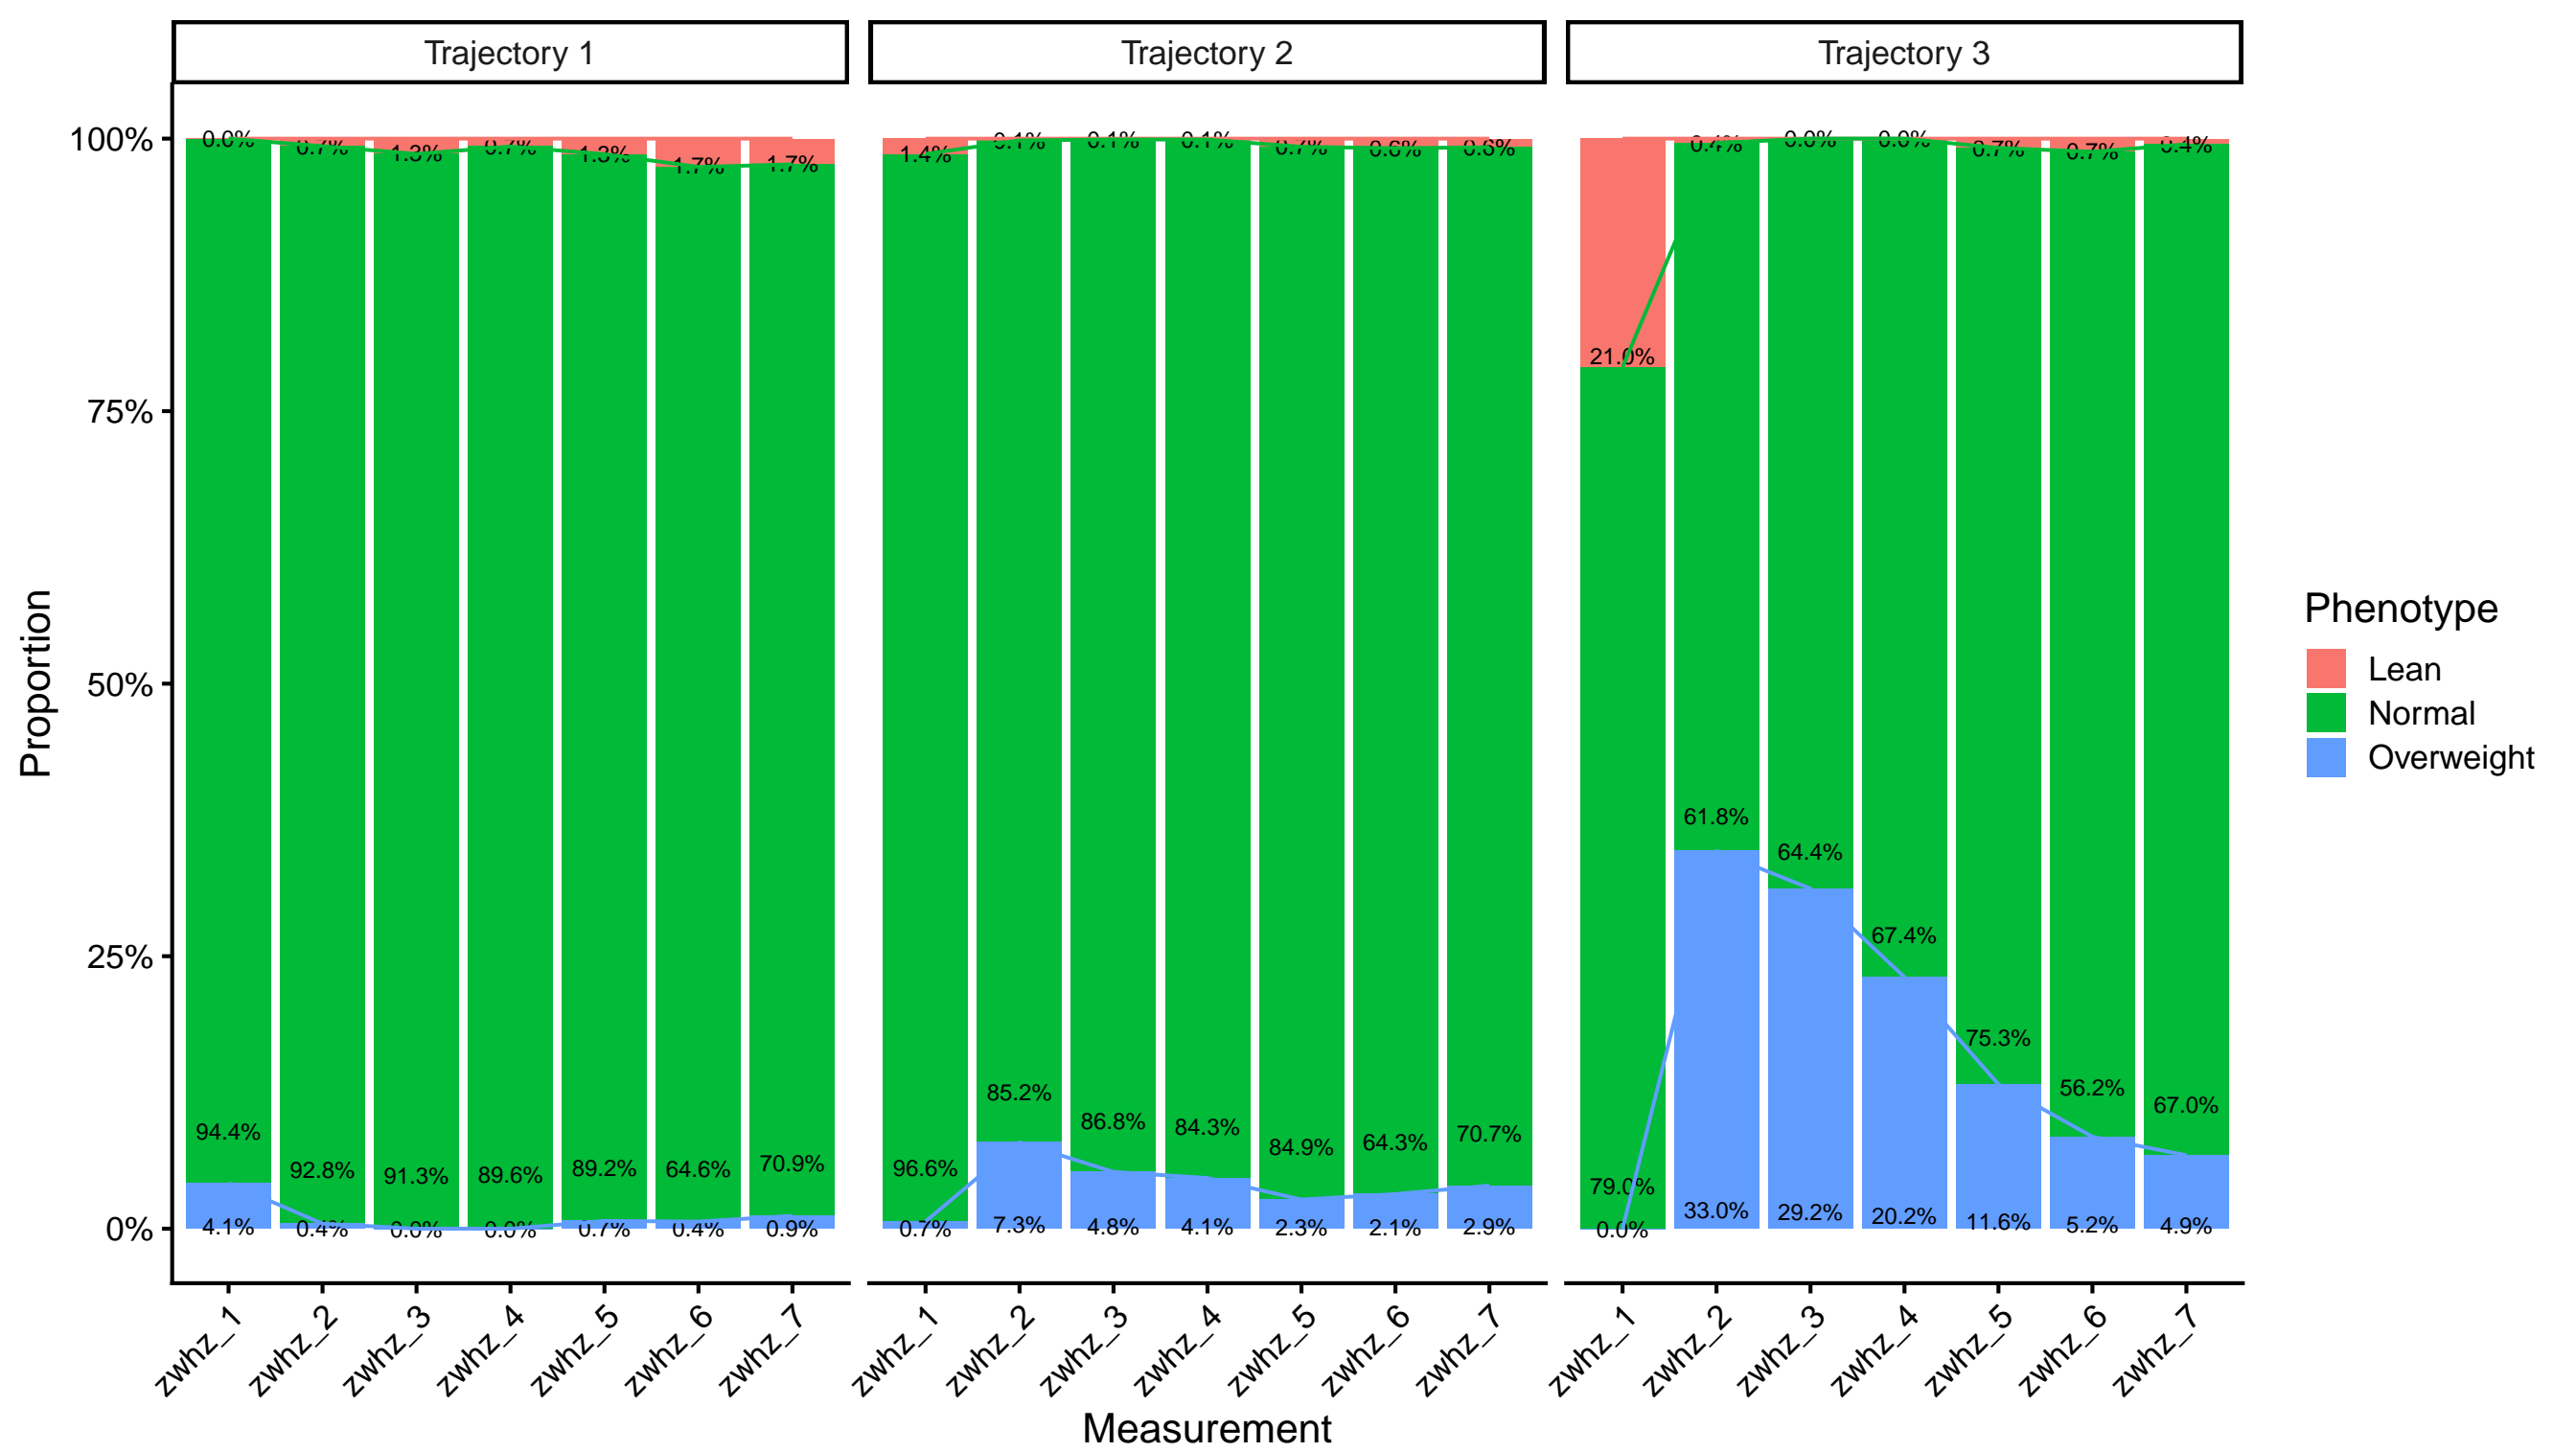

Supplement: Supplementary file 2 [file 98ff31fb9106cc6b5646cd8e.pdf]

**A**

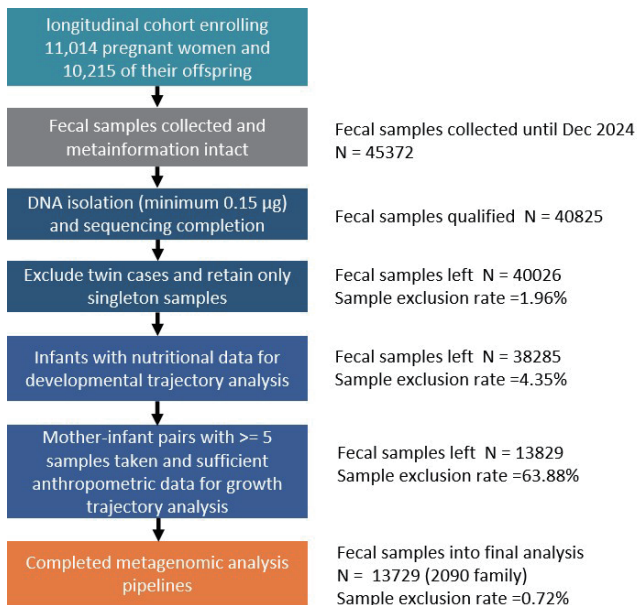

**B**

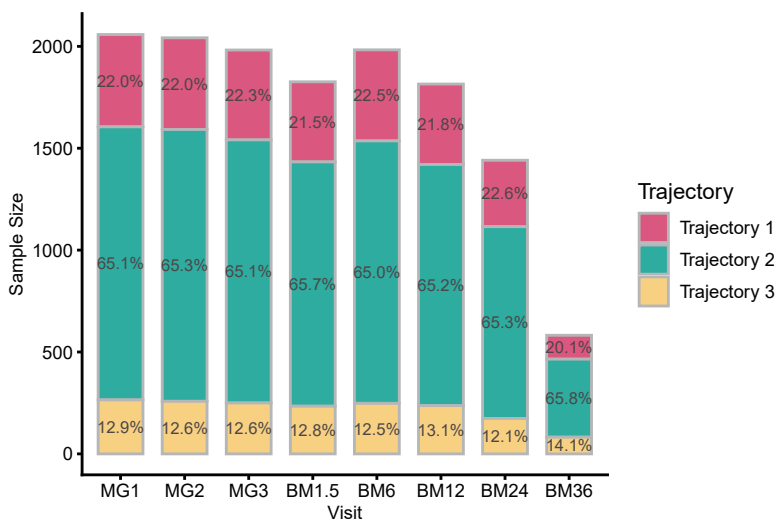

Supplement: Supplementary file 3 [file b846c3d2c75575f47b58a5f6.pdf]

**A** Distribution of Clean Read Counts

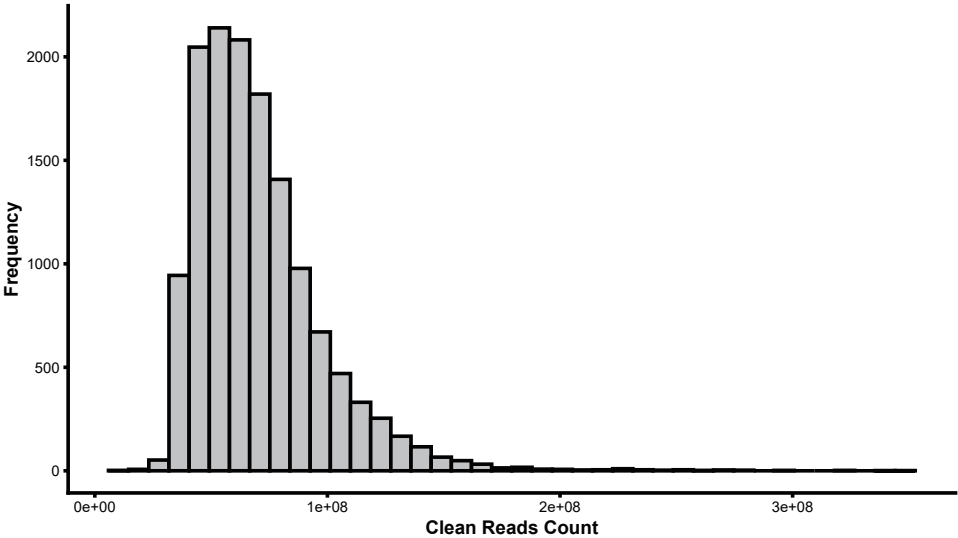

**B** Sample-to-Sample Correlation Heatmap

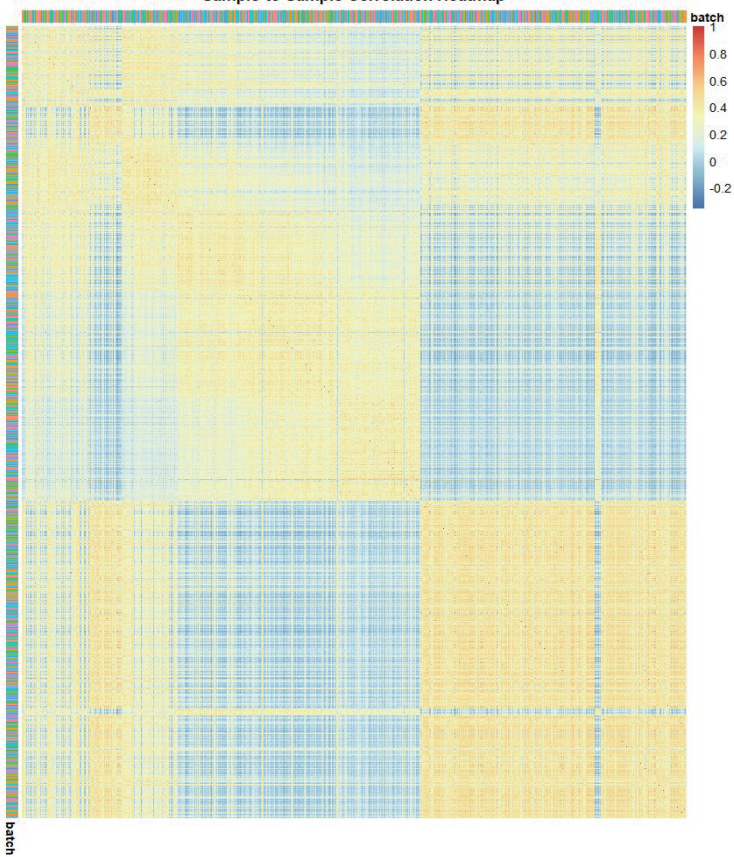

Supplement: Supplementary file 4 [file d40c91f98d873bde836c2418.pdf]
